# Supplementary material for: The Role of Diet and Lifestyle in Early-Onset Colorectal Cancer: A Systematic Review
Source: Cancers (Basel). 2021 Nov 25;13(23):5933. doi: 10.3390/cancers13235933 (PMC8657307; doi:10.3390/cancers13235933)
Supplement: Supplementary file 1 [file cancers-13-05933-s001.zip › cancers-1458254-supplementary.pdf]

**Table S1.** Summary of the revised literature on exogenous risk factors in early-onset colorectal cancer. OR—odds ratio; RR—relative risk; eoCRC—early-onset colorectal cancer; BMI—body mass index; NS—statistically not significant; Uv—univariate analysis; Mv—multivariate analysis.

| Authors, ref.                            | Type of study, Country                              | Population (N) | eoCRC Cases (N)     | Controls (N)   | Age range/Mean Age $\pm$ SD | Sex | Exogenous risk factors analyzed                                                                                                                                                                                                                                                                                                                                                                      | ORs/HRs/Rs ( $\pm$ 95% CI) for eoCRC (unless otherwise specified)                                                                                                                                                                                                                                                        | Notes                                                                                                                                                                                           |
|------------------------------------------|-----------------------------------------------------|----------------|---------------------|----------------|-----------------------------|-----|------------------------------------------------------------------------------------------------------------------------------------------------------------------------------------------------------------------------------------------------------------------------------------------------------------------------------------------------------------------------------------------------------|--------------------------------------------------------------------------------------------------------------------------------------------------------------------------------------------------------------------------------------------------------------------------------------------------------------------------|-------------------------------------------------------------------------------------------------------------------------------------------------------------------------------------------------|
| <b>Imperiale <i>et al.</i> 2008 [37]</b> | Retrospective case-control study (multicenter), USA | 74             | 20 ACRN (11 eoCRCs) | 54 age-matched | 28-49                       | M/F | <ul style="list-style-type: none"> <li>●Dietary factors (1998 Block food frequency survey [84])</li> <li>●Alcohol (not further specified)</li> <li>●Smoking (not further specified)</li> <li>●Regular exercise (not further specified)</li> <li>●Weight at 21y</li> <li>●Waist circumference at 21 y</li> <li>●Lightest weight since 21y</li> <li>●Smallest waist circumference since 21y</li> </ul> | OR for ACRN [Regular exercise] = 0.39 (0.12–1.34);<br>NS<br>Pvalue * [lightest weight since 21y] = <b>0.049</b><br>No differences between case and controls in: (i) any of the 28 pre-selected dietary factors of the Block food frequency survey; (ii) alcohol use; (iii) cigarette smoking; (iv) weight at 21y (lbs.), | Advanced colorectal neoplasia (ACRN) defined as: adenocarcinoma or polyp with high-grade dysplasia of villous histology or tubular adenoma $\geq$ 1cm.<br>* Adjusted for differences in gender. |

|                                       |                                                      |      |     |                  |       |     |                                                                                                             |                                                                                                                                 |
|---------------------------------------|------------------------------------------------------|------|-----|------------------|-------|-----|-------------------------------------------------------------------------------------------------------------|---------------------------------------------------------------------------------------------------------------------------------|
|                                       |                                                      |      |     |                  |       |     |                                                                                                             | waist circumference at 21 y (in.), smallest waist circumference since 21y.                                                      |
|                                       |                                                      |      |     |                  |       |     |                                                                                                             | MvA OR [Alcohol intake $\geq 14$ drinks/w] =                                                                                    |
|                                       |                                                      |      |     |                  |       |     | ●Alcohol intake (drinks/week)                                                                               | <b>1.56</b> (1.12–2.16); P <sub>trend</sub> = <b>0.009</b>                                                                      |
|                                       |                                                      |      |     |                  |       |     | ●Diet (tertile of intake)                                                                                   | MvA OR [BMI $\geq 25$ ] =                                                                                                       |
|                                       |                                                      |      |     |                  |       |     | ●BMI at 30y (kg/m <sup>2</sup> ),                                                                           | 0.91 (0.48–1.73); NS                                                                                                            |
|                                       |                                                      |      |     |                  |       |     | ●Occupational physical activity at 30–39y (mainly sitting, mainly standing, intermediate, heavy, strenuous) | MvA OR [physical activity STRENUOUS] = 1.28 (0.56–2.89); NS                                                                     |
|                                       |                                                      |      |     |                  |       |     | ●Leisure time physical activity at 30–39y (h/week)                                                          | MvA OR [Leisure time activity >7h/w] = 0.86 (0.45–1.63); NS                                                                     |
|                                       |                                                      |      |     |                  |       |     |                                                                                                             | MvB OR [Processed meat HIGH tertile] = <b>1.56</b> (1.11–2.20); P <sub>trend</sub> = <b>0.008</b>                               |
| <b>Rosato <i>et al.</i> 2013 [29]</b> | Case-control study (multicenter), Italy, Switzerland | 1690 | 329 | 1361 age-matched | 19–45 | M/F |                                                                                                             | MvA: age, sex, center, study, year of interview, education, family history of CRC, alcohol intake. MvB: as MvA + energy intake. |



● Alcohol = 0.31 (0.10- \* significant  
 (no/yes) 1.00); NS at 5%.  
 Uv OR [Veg- Mv OR: ad-  
 etarian] = justed for all  
**0.11** (0.06- independent  
 0.20) \*\* variables  
 Mv OR (not listed).  
 [Vegetarian]  
 = 0.06 (0.02-  
 0.22); NS  
 Uv OR [Re-  
 fined foods]  
 = **0.01** (0.00-  
 0.04) \*\*  
 Uv OR  
 [High fat  
 diet] = **1.98**  
 (1.13-3.49) \*  
 Mv OR  
 [High fat  
 diet] = 1.64  
 (0.58-4.62);  
 NS  
 Uv OR  
 [Smoking] =  
**2.12** (1.08-  
 4.17) \*  
 Mv OR  
 [Smoking] =  
 1.27 (0.24-  
 6.85); NS  
 Uv OR [Al-  
 cohol intake]  
 =**3.90** (2.00-  
 7.58) \*\*  
 Mv OR [Al-  
 cohol intake]

---



|                            |                                                                                                  |         |      |                  |       |     |                                                                          |                                                               |                                                                                                                                                                                                                                                                                                                                           |
|----------------------------|--------------------------------------------------------------------------------------------------|---------|------|------------------|-------|-----|--------------------------------------------------------------------------|---------------------------------------------------------------|-------------------------------------------------------------------------------------------------------------------------------------------------------------------------------------------------------------------------------------------------------------------------------------------------------------------------------------------|
|                            |                                                                                                  |         |      |                  |       |     |                                                                          |                                                               | Mv: adjusted<br>for height,<br>family his-<br>tory of CRC,<br>diabetes,<br>screening<br>lower endos-<br>copy within<br>past 10y,<br>Mv RR [ 7.1-<br>14 h/w] =1.12 (0.72-<br>1.75) }<br>Mv RR [ >14<br>h/w] =1.69<br>(1.07-2.67)<br>Ptrend = 0.03<br>Mv RR for<br>eo-rectal<br>cancer [ >14<br>h/w] =2.44<br>(1.03-5.78);<br>Ptrend = 0.04 |
| Nguyen et<br>al. 2018 [28] | Prospective<br>cohort study<br>(The Nurses'<br>Health<br>Study II)<br>(multicen-<br>ter),<br>USA | 89278   | 118  | NA               | 41-47 | F   | ● Sedentary<br>TV viewing<br>time<br>(h/week)                            |                                                               | Mv: adjusted<br>for height,<br>family his-<br>tory of CRC,<br>diabetes,<br>screening<br>lower endos-<br>copy within<br>past 10y,<br>Mv RR [ 7.1-<br>14 h/w] =1.12 (0.72-<br>1.75) }<br>Mv RR [ >14<br>h/w] =1.69<br>(1.07-2.67)<br>Ptrend = 0.03<br>Mv RR for<br>eo-rectal<br>cancer [ >14<br>h/w] =2.44<br>(1.03-5.78);<br>Ptrend = 0.04 |
| Glover et al.<br>2019 [84] | Retrospec-<br>tive analysis<br>of a com-<br>mercial data-                                        | 8873080 | 1680 | 8871400<br>NoCRC | 20-39 | M/F | ● BMI<br>(kg/m <sup>2</sup> )<br>● Alcohol<br>(not further<br>specified) | Mv OR<br>[smoking] =<br>2.675 (2.406-<br>2.974); P <<br>0.001 | eoCRC = 20-<br>39y individ-<br>uals with<br>CRC                                                                                                                                                                                                                                                                                           |

base (Explorys Inc., Cleveland, OH), USA

● Smoking (not further specified) Mv OR [obe-NoCRC = 20-39y individuals without CRC] = **1.819** (1.618–2.044); **P < 0.001**  
 Mv OR [Alcohol] = 0.908 (0.658–1.254); **P = 0.56**  
 Exclusion criteria: Crohn's disease, ulcerative Colitis, and family history of colorectal cancer (including patients with familial colorectal cancer syndromes).

|                             |                                                                                               |       |                     |    |       |     |                                                                                                                                                 |                                                                                                                                                            |                                                                                                                                                                                         |
|-----------------------------|-----------------------------------------------------------------------------------------------|-------|---------------------|----|-------|-----|-------------------------------------------------------------------------------------------------------------------------------------------------|------------------------------------------------------------------------------------------------------------------------------------------------------------|-----------------------------------------------------------------------------------------------------------------------------------------------------------------------------------------|
| <b>Kim et al. 2019 [27]</b> | Retrospective cross-sectional study (Kangbuk Samsung Health Study) (multicenter), South Korea | 72356 | 622 ACRN (14 eoCRC) | NA | 20-39 | M/F | ●Smoking (never/current or former)                                                                                                              | Mv OR for ACRN [20-29y] [Current or former Smoker] =                                                                                                       | Advanced colorectal neoplasms (ACRN) defined as: adenoma ≥1cm, adenoma with any component of villous histology, high-grade dysplasia, or invasive cancer.<br>Mv: adjusted for age, sex, |
|                             |                                                                                               |       |                     |    |       |     | ●Alcohol intake (≥20 g/d) ●Obesity (BMI ≥ 25 (kg/m <sup>2</sup> ) ●Regular exercise (moderate or vigorous for ≥3 times/week) ●Abdominal obesity | 0.88 (0.49–2.06); NS<br>Mv OR for ACRN [30-39y] [Current or former Smoker] = <b>1.30</b> (1.05–1.61); <b>P = 0.015</b><br>Mv OR for ACRN [20-29y] [Alcohol |                                                                                                                                                                                         |

(waist cir- intake ≥ smoking, al-  
cumference 20g/d] = 1.42 cohol, obe-  
> 90 cm for (0.78–3.27); sity (BMI ≥  
men and > NS 25 kg/m2),  
80 for Mv OR for NSAID use,  
women) ACRN [30-39regular exer-  
y] [Alcohol cise.  
intake ≥  
20g/d] = **1.34**  
(1.10–1.63); P  
= **0.004**  
Mv OR for  
ACRN [20-29  
y] [Regular  
exercise] =  
0.66 (0.23–  
1.87); NS  
Mv OR for  
ACRN [30-39  
y] [Regular  
exercise] =  
0.98 (0.75–  
1.28); NS  
Mv OR for  
ACRN [20-29  
y] [BMI  
obese] = **2.46**  
(1.24–4.87); P  
= **0.01**  
Mv OR for  
ACRN [30-39  
y] [BMI  
obese] = **1.33**  
(1.11–1.61); P  
= **0.003**  
Mv OR for  
ACRN [20-29

---

|                             |                                                                           |       |     |    |       |   |                                                                                                                                             |  |                                                                                                                                                                                                                                                                                |
|-----------------------------|---------------------------------------------------------------------------|-------|-----|----|-------|---|---------------------------------------------------------------------------------------------------------------------------------------------|--|--------------------------------------------------------------------------------------------------------------------------------------------------------------------------------------------------------------------------------------------------------------------------------|
|                             |                                                                           |       |     |    |       |   |                                                                                                                                             |  | y] [Abdominal obesity] = <b>2.26</b> (1.12–4.54); P = <b>0.023</b><br>Mv OR for ACRN [30-39 y] [Abdominal obesity] = <b>1.28</b> (1.05–1.57); P = <b>0.014</b>                                                                                                                 |
|                             |                                                                           |       |     |    |       |   |                                                                                                                                             |  | MvA RR [current BMI 25-29.9] = <b>1.37</b> (0.81-2.30)<br>MvA RR [current BMI ≥ 30] = <b>1.93</b> (1.15-3.25)<br>Ptrend = <b>0.01</b><br>MvB RR [BMI at 18y ≥ 23] = 1.63 (1.01-2.61); NS<br>MvC RR [weight change GAIN 20-39.9 kg] = <b>1.65</b> (0.96-2.81)<br>MvC RR [weight |
|                             |                                                                           |       |     |    |       |   |                                                                                                                                             |  | MvA: adjusted for height, history of diabetes, smoking pack-years, alcohol intake, regular aspirin, NSAID, multivitamin, menopausal status, menopausal hormone use, dietary intake (total calories, red meat, fiber, folate, calcium), physical activities.                    |
| <b>Liu et al. 2019 [31]</b> | Prospective cohort study (The Nurses' Health Study II) (multicenter), USA | 85256 | 114 | NA | 41-47 | F | <ul style="list-style-type: none"> <li>● BMI (kg/m<sup>2</sup>) at 18y</li> <li>● Current BMI</li> <li>● Weight change since 18y</li> </ul> |  |                                                                                                                                                                                                                                                                                |

}

}

change  
GAIN  $\geq 40$   
kg] = **2.15**  
(1.01-4.55)  
Ptrend =  
**0.007**

MvB: as  
MvA + fam-  
ily history of  
CRC, screen-  
ing lower  
endoscopy  
within past  
10y, lower  
endoscopy  
due to other  
indications  
within past  
10y, weight  
change since  
18y.

MvC: as  
MvA + fam-  
ily history of  
CRC, screen-  
ing lower  
endoscopy  
within past  
10y, lower  
endoscopy  
due to other  
indications  
within past  
10y, BMI at  
18y.

|                          |                                                                                             |       |      |                                     |       |     |                                                                                                                                           |                                                      |                                                     |
|--------------------------|---------------------------------------------------------------------------------------------|-------|------|-------------------------------------|-------|-----|-------------------------------------------------------------------------------------------------------------------------------------------|------------------------------------------------------|-----------------------------------------------------|
| Syed et al.<br>2019 [70] | Population-<br>based cohort<br>analysis (Ex-<br>plorys data-<br>base 2012-<br>2016),<br>USA | 68860 | 5710 | 11800420<br>age-matched<br>controls | 25-49 | M/F | <ul style="list-style-type: none"> <li>● BMI (kg/m<sup>2</sup>)</li> <li>● Smoking (yes/no)</li> <li>● Alcohol intake (yes/no)</li> </ul> | Mv OR [BMI $\geq 30$ ] = 2.88 (2.74-3.04)            | Mv: male gender, Caucasian and African-             |
|                          |                                                                                             |       |      |                                     |       |     |                                                                                                                                           | Mv OR [smoking] = 2.46 (2.33-2.59)<br>Ptrend < 0.001 | American race, abdominal pain, rectal pain, altered |

}



|                                 |                                                                               |             |      |                                  |       |     |                                                |                                                                   |                                                                                                                                                                                                                                                                                                                                                                                |
|---------------------------------|-------------------------------------------------------------------------------|-------------|------|----------------------------------|-------|-----|------------------------------------------------|-------------------------------------------------------------------|--------------------------------------------------------------------------------------------------------------------------------------------------------------------------------------------------------------------------------------------------------------------------------------------------------------------------------------------------------------------------------|
|                                 |                                                                               |             |      |                                  |       |     |                                                |                                                                   | Mv: age, sex, duration of insurance enrolment and region, health insurance plan, residence and the following factors between 91 days and 2 years prior to the index dates: outpatient visits, Charlson Comorbidity Index without diabetes, IBD, family history of GI neoplasm, screening colonoscopy, other colonoscopies, faecal occult blood test and regular Rx NSAIDs use. |
| <b>Chen et al. 2020 [105]</b>   | Nested case-control study (IBM MarketScan Commercial Database 2006–2015), USA | 113 million | 4673 | 40832 frequency-matched controls | 18-50 | M/F | ●Metabolic syndrome co-morbidity               | Mv OR [Metabolic syndrome] = 1.25 (1.09 to 1.43); P trend < 0.001 |                                                                                                                                                                                                                                                                                                                                                                                |
| <b>Gausman et al. 2020 [30]</b> | Retrospective case-control study (single-institution),                        | 4193        | 269  | 2802 late-onset CRC<br>1122 age- | 18-49 | M/F | ●BMI (kg/m <sup>2</sup> )<br>●Smoking (yes/no) | Mv OR <i>eoCRC vs age-matched controls</i> [BMI of overweight]    | Exclusion criteria: personal history of hereditary CRC syn-                                                                                                                                                                                                                                                                                                                    |



|                                        |                                                                          |         |                                                    |      |       |     |                                     |                                                                                                                                        |                                                                                                                                                                                                    |
|----------------------------------------|--------------------------------------------------------------------------|---------|----------------------------------------------------|------|-------|-----|-------------------------------------|----------------------------------------------------------------------------------------------------------------------------------------|----------------------------------------------------------------------------------------------------------------------------------------------------------------------------------------------------|
|                                        | USA                                                                      |         |                                                    |      |       |     |                                     | (p) with geo-gery, chemo-graphical therapy, and hotspot of radiation mortality therapy. [smoking] = <b>0.09</b> ; Ptrend < <b>0.01</b> |                                                                                                                                                                                                    |
| <b>Hussan <i>et al.</i> 2020 [104]</b> | Cohort study (Surveillance, Epidemiology, and End Results database), USA | 1272243 | 10178 (Obese)                                      | NA   | 20-49 | M/F | ●BMI (kg/m²) at CRC resection       | Average annual percentage change (2002-2013) eoCRC diagnosis [BMI ≥ 30] = <b>+15.3%</b> ; Ptrend = 0.047                               | Patient-level variables: age, gender, median household income quartile by zip code, health insurance status.                                                                                       |
| <b>Krigel <i>et al.</i> 2020 [118]</b> | Retrospective study (monocenter), USA                                    | 4333    | 363 any CRN, of which 48 ACRN (of which 26 eoCRCs) | 3970 | 18-49 | M/F | ● Smoking status (no, yes, unknown) | Mv OR [smoking yes] = 2.17 (0.97-4.85; P = 0.059)<br>Mv OR [smoking unknown] = <b>3.11</b> (1.57-6.14); P = <b>0.001</b>               | ACRN = advanced colorectal neoplasia: advanced adenomas or adenocarcinoma.<br>Exclusion criteria: personal history of CRN, inflammatory bowel diseases, those undergoing colonoscopy for screening |

|                                  |                                                                                                    |        |     |                                               |       |     |                                                                                                                                                                                        | only or without a known indication.                               |
|----------------------------------|----------------------------------------------------------------------------------------------------|--------|-----|-----------------------------------------------|-------|-----|----------------------------------------------------------------------------------------------------------------------------------------------------------------------------------------|-------------------------------------------------------------------|
| Low <i>et al.</i> 2020 [32]      | Retrospective case-control study (Veterans Health Administration), (multi-center), USA             | 68067  | 651 | 67416 Age-matched normal Colonoscopy Controls | 18-49 | M/F | Mv OR [Former smoker] = <b>0.82</b> (0.60-1.12) *                                                                                                                                      | * P < 0.05.                                                       |
|                                  |                                                                                                    |        |     |                                               |       |     | Mv OR [Current smoker] = <b>1.10</b> (0.89-1.35) *                                                                                                                                     |                                                                   |
|                                  |                                                                                                    |        |     |                                               |       |     | ●Smoking (never/former/current) Mv OR [BMI underweight] = <b>1.87</b> (0.86-4.04) *                                                                                                    |                                                                   |
|                                  |                                                                                                    |        |     |                                               |       |     | ●BMI (underweight/normal/overweight/obese/unknown) Mv OR [BMI overweight] = <b>0.69</b> (0.55-0.87) *                                                                                  |                                                                   |
|                                  |                                                                                                    |        |     |                                               |       |     | ●Aspirin use (no/yes) Mv OR [BMI obese] = <b>0.69</b> (0.55-0.86) *<br>Mv OR [aspirine use] = <b>0.66</b> (0.52-0.84) *                                                                |                                                                   |
| Sanford <i>et al.</i> 2020 [103] | Cross-sectional household survey (National Health Interview Survey – self reported diagnosis), USA | 321975 | 239 | NA                                            | 18-49 | M/F | ●BMI (kg/m²)<br>●Smoking (non smoking / current or former smoker)<br>Mv OR [BMI ≥ 30, self-reported EOCRC] = <b>1.39</b> (1.00–1.92); P = 0.049;<br>Mv OR [Age (< vs. ≥50 years)] *BMI | Mv: BMI, age, sex, race, ethnicity, insurance status and smoking. |
|                                  |                                                                                                    |        |     |                                               |       |     |                                                                                                                                                                                        |                                                                   |

| Author (year) [ref]           | Study design                                                              | n     | Population                                | Age (years) | Sex   | Outcome | OR (95% CI)                                                                                                                                                                                                                                                                                                                                                                                                                                                                                                 | P trend                                                                                                                                                                                                                                                                                                                                          |
|-------------------------------|---------------------------------------------------------------------------|-------|-------------------------------------------|-------------|-------|---------|-------------------------------------------------------------------------------------------------------------------------------------------------------------------------------------------------------------------------------------------------------------------------------------------------------------------------------------------------------------------------------------------------------------------------------------------------------------------------------------------------------------|--------------------------------------------------------------------------------------------------------------------------------------------------------------------------------------------------------------------------------------------------------------------------------------------------------------------------------------------------|
| Zheng <i>et al.</i> 2020 [33] | Prospective cohort study (The Nurses' Health Study II) (multicenter), USA | 29474 | 375 early-onset high-risk adenoma (eoHRA) | NA          | 41-47 | F       | <p>(<math>&lt; \text{vs. } \geq 30</math>) = <b>0.67</b> (0.47-0.94); P = 0.02</p> <p>Mv OR [smoking, self-reported EOCRC] = <b>1.51</b> (1.10-2.08); P = 0.01</p>                                                                                                                                                                                                                                                                                                                                          |                                                                                                                                                                                                                                                                                                                                                  |
|                               |                                                                           |       |                                           |             |       |         | <p>Mv OR <i>for eoHRA</i> [Western diet HIGH-EST quintile] = <b>1.67</b> (1.18-2.37); Ptrend = <b>0.01</b></p> <p>●Western dietary pattern (quartile or quintile of consumption) ●Prudent dietary pattern (quintile of consumption)</p> <p>Mv OR <i>for eoHRA</i> [Prudent diet HIGHEST quintile] = <b>0.69</b> (0.48-0.98); Ptrend = <b>0.03</b></p> <p>Mv OR <i>for advanced adenomas of distal colon and rectum</i> [Western diet HIGH-EST quartile] = <b>1.65</b> (1.14-2.38); Ptrend = <b>0.01</b></p> | <p>High-risk adenomas (HRA) defined as any of the following: <math>\geq 1</math> cm in size, tubulovillous/villous histology, high-grade dysplasia, presence of <math>\geq 3</math> adenomas. Advanced adenomas defined considering only size and histology.</p> <p>Mv: adjusted for age, total caloric intake, time period of endoscopy, n.</p> |



|                                     |                                                                                                                                                                                 |      |      |                  |      |     |                                                                                                                                                                                                                                                                                                                                                                                                                                                                                                                                                                                                                         |                                                                                                                                                                                                                                                                                                                                                     |                                                                                              |
|-------------------------------------|---------------------------------------------------------------------------------------------------------------------------------------------------------------------------------|------|------|------------------|------|-----|-------------------------------------------------------------------------------------------------------------------------------------------------------------------------------------------------------------------------------------------------------------------------------------------------------------------------------------------------------------------------------------------------------------------------------------------------------------------------------------------------------------------------------------------------------------------------------------------------------------------------|-----------------------------------------------------------------------------------------------------------------------------------------------------------------------------------------------------------------------------------------------------------------------------------------------------------------------------------------------------|----------------------------------------------------------------------------------------------|
|                                     |                                                                                                                                                                                 |      |      |                  |      |     |                                                                                                                                                                                                                                                                                                                                                                                                                                                                                                                                                                                                                         |                                                                                                                                                                                                                                                                                                                                                     | formed pooling together cases of adenoma and eoCRC, considering age as a continuous variable |
| Archambault <i>et al.</i> 2021 [57] | Data from 13 population-based studies (Colon Cancer Family Registry, the Colorectal Transdisciplinary study, and the Genetics and Epidemiology of Colorectal Cancer Consortium) | 7816 | 3767 | 4049 Age-matched | < 50 | M/F | <ul style="list-style-type: none"><li>● Smoking (pack-years of smoking among current and former smokers) Mv OR [Pack-years of smoking] = 0.96 (0.92-1.01); P = 0.12</li><li>● Sedentary lifestyle (yes if moderate/vigorous physical activity, leisure time, and undifferentiated activities for &lt; 1 hour/week) Mv OR [Alcohol use, 0 g/d] = <b>1.23</b> (1.08-1.39); P = <b>0.001</b></li><li>● Alcohol (&lt;1 g/day - nondrinker, 1-28 g/day, &gt; 28 g/day). Mv OR [Lower fruit intake, servings/dd] = 1.01 (0.96-1.07); P = 0.69</li><li>● Dietary factors: fruit, vegetable, red meat, processed meat</li></ul> | All self-reported variables were ascertained at the reference time for each study, defined as patient selection or blood collection for cohort studies and 1-2 years prior to selection for case-control studies, to ensure exposures were assessed before cancer diagnoses. For studies assessing height and BMI via direct measurement, variables |                                                                                              |

|                                      |                                                                    |     |     |                            |       |     |                                                                                                           |                                                                                                            |                                                                                                                                                                                                                                                                                                                                 |                                                               |
|--------------------------------------|--------------------------------------------------------------------|-----|-----|----------------------------|-------|-----|-----------------------------------------------------------------------------------------------------------|------------------------------------------------------------------------------------------------------------|---------------------------------------------------------------------------------------------------------------------------------------------------------------------------------------------------------------------------------------------------------------------------------------------------------------------------------|---------------------------------------------------------------|
|                                      |                                                                    |     |     |                            |       |     |                                                                                                           | (serv-ings/day); total dietary fiber intake (g/day).                                                       | Mv OR [Lower vegetable intake, servings/dd] = 1.00 (0.94-1.06); P = 0.98<br>Mv OR [Greater red meat intake, servings/dd] = <b>1.10</b> (1.04-1.16); <b>P &lt;.001</b><br>Mv OR [Greater processed meat intake, servings/dd] = 1.03 (0.95-1.12); P = 0.43<br>Mv OR [Lower total fiber intake, g/dd] = 1.11 (1.00-1.23); P = 0.06 | were captured at the reference time of each respective study. |
| <b>Chang <i>et al.</i> 2021 [59]</b> | Retrospective case-control study (Ontario Cancer Registry), Canada | 428 | 175 | 253<br>age and sex-matched | 20-49 | M/F | ● BMI (kg/m <sup>2</sup> ) 2 years before diagnosis (obese ≥ 30.0 kg/m <sup>2</sup> )<br>● BMI at 20years | Mv OR [BMI obese, 2y before] = 0.59 (0.34–1.01); <i>p</i> trend = 0.06<br>Mv OR [BMI obese, at 20y] = 0.43 | Information on tumor microsatellite instability (MSI) status was obtained from pathology reports of                                                                                                                                                                                                                             |                                                               |

---

● Smoking status (never, ever) (0.20–0.90); *ptrend* = 0.06 eoCRCs: 89% MSI-low, 11% MSI-high.

● Pack-year smoking (<3.5 / 3.5–9.9 / ≥10) Mv OR [ever smoking] = 1.07 (0.68–1.67) Dietary habits and other lifestyle factors were referred to the first tertile of pack-years time period month / 1–6 times per week / daily) = 1.94 (1.04–3.60) “2 years ago”.

● Physical activity (active: ≥ 24 units; somewhat active: 14–23 units; insufficiently active: < 14 units) [smoking, third tertile of pack-years] = 0.79 (0.40–1.57) Mv: Adjusted for age, sex, family history of CRC, regular aspirin/NSAID use, smoking, physical activity, BMI, alcohol, red/processed meat intake, total fruit and vegetable intake, high-fiber food intake, calcium supplementation use.

● Sedentary time (<5h per day / 5–10h per day / ≥ 10h per day) [physical activity, insufficiently active] = 1.46 (0.90–2.38) Mv OR [daily alcohol consumption] = 1.93 (1.02–3.65); ***ptrend* = 0.049**

● Diet (daily or weekly frequency of consumption of fruits, vegetables, high-fiber /wholegrain) Mv OR [daily alcohol consumption] = 1.93 (1.02–3.65); ***ptrend* = 0.049**

● Ever smoked: ≥

---

---

|                                                           |                                                                                                |                                                                                                                                                                                                       |
|-----------------------------------------------------------|------------------------------------------------------------------------------------------------|-------------------------------------------------------------------------------------------------------------------------------------------------------------------------------------------------------|
| foods, red meat, processed meat,                          | 1.07 (0.49–2.32)                                                                               | 100 cigarettes before 2 years ago.                                                                                                                                                                    |
| sugary deserts, fast food, canned food, processed snacks) | Mv OR [sugary drinks, ≥ 7/week] = <b>2.99</b> (1.57–5.68); <i>ptrend</i> = <b>0.002</b>        | ●Pack-year: calculated by multiplying the number of packs of cigarettes                                                                                                                               |
| ●Westernized dietary pattern (quartile)                   | Mv OR [sugary desserts, (3–6 times/week)] = 2.28 (1.28–4.04)                                   | smoked per day (1 pack = 20 cigarettes) by the number of years                                                                                                                                        |
| drinks, coffee/tea, water, sugar substitutes)             | Mv OR [Total fruits and vegetables, ≥ 6 servings/day] = 0.58 (0.30–1.13); <i>ptrend</i> = 0.11 | ●Physical activity: adapted from the Godin-Shephard Leisure-Time Physical Activity Questionnaire: number of times engaged in strenuous or moderate exercise for > 15 min during a typical 7-day week. |
|                                                           | Mv OR [red meat, ≥ 5 servings/week] = 1.06 (0.56–1.98)                                         | Weekly frequency (times per                                                                                                                                                                           |
|                                                           | Mv OR [processed meat, moderate exercise, ≥ 3 servings/week] = 1.23 (0.62–2.42)                |                                                                                                                                                                                                       |
|                                                           | Mv OR [sugary dessert, ≥ 7                                                                     |                                                                                                                                                                                                       |

---

---

|                        |                |
|------------------------|----------------|
| times/week]            | week) of       |
| = 1.45 (0.86–          | strenuous      |
| 2.47)                  | and moder-     |
| Mv OR [fast            | ate exercise   |
| food, ≥ 2              | was multi-     |
| times/week]            | plied by 9     |
| = 1.84 (0.98–          | and 5, re-     |
| 3.46);                 | spectively,    |
| <i>ptrend</i> =0.07    | and            |
| Mv OR                  | summed         |
| [canned                | across activ-  |
| food, ≥ 3              | ity types to   |
| times/week]            | calculate the  |
| = 1.70 (0.95–          | composite      |
| 3.05);                 | score (active: |
| <i>ptrend</i> =0.09    | ≥ 24 units;    |
| Mv OR [cof-            | somewhat       |
| fee or tea, ≥ 3        | active: 14–23  |
| cups/day] =            | units; insuf-  |
| 1.68 (0.85–            | ficiently ac-  |
| 3.30)                  | tive: < 14     |
| Mv OR [Ar-             | units)         |
| tificial               | ●Sedentary     |
| sweeteners,            | time (num-     |
| ≥ 7                    | ber of hours   |
| times/week]            | spent sitting  |
| = 1.66 (0.89–          | on a typical   |
| 3.13)                  | day at work,   |
| Mv OR                  | school,        |
| [Western               | home, in a     |
| diet, quartile         | car/bus/train  |
| 4] = <b>1.92</b>       | , and during   |
| (1.01–3.66);           | leisure time,  |
| <b><i>ptrend</i></b> = | averaged       |
| <b>0.047</b>           | over week-     |
|                        | days and       |
|                        | weekend        |

---

|                                         |                                                                          |      |            |             |         |     | NB: p value for linear trend calculated by treating the ordinal variable or the median value of each category (where applicable) as a continuous variable in the model, shown only when ptrend is < 0.10 for at least one of the age- and sex- adjusted and multivariable-adjusted ORs                                   | days) supplement use                                                            |
|-----------------------------------------|--------------------------------------------------------------------------|------|------------|-------------|---------|-----|--------------------------------------------------------------------------------------------------------------------------------------------------------------------------------------------------------------------------------------------------------------------------------------------------------------------------|---------------------------------------------------------------------------------|
| <b>Himbert <i>et al.</i> 2021 [113]</b> | Prospective cohort study (ColoCare Study) (multicenter), USA and Germany | 2193 | 459 eoCRCs | 1734 loCRCs | 60 ± 13 | M/F | ●BMI (underweight ≤18.5 kg/m <sup>2</sup> ; normal weight >18.5 kg/m <sup>2</sup> ; overweight ≥25 kg/m <sup>2</sup> to <30 kg/m <sup>2</sup> ; obese ≥30 kg/m <sup>2</sup> ).<br>Mv OR [BMI derweight overweight] = 0.56 (0.41-0.76)<br>Mv OR [BMI obese] = 0.66 (0.48-0.90)<br>Mv OR [Never smoker] = 1.55 (1.21-1.98) | MV: adjusted for sex, race, tumor site and stage, BMI, smoking, and study site. |

|                             |                                                                           |                                                                  |            |    |            |   | ● Smoking<br>(ever-smoker/never smoker)                                                                                                                            |                                                                                                                                                                                                                                                                                                                                                          |
|-----------------------------|---------------------------------------------------------------------------|------------------------------------------------------------------|------------|----|------------|---|--------------------------------------------------------------------------------------------------------------------------------------------------------------------|----------------------------------------------------------------------------------------------------------------------------------------------------------------------------------------------------------------------------------------------------------------------------------------------------------------------------------------------------------|
|                             |                                                                           |                                                                  |            |    |            |   |                                                                                                                                                                    | MV: adjusted for race, height, BMI, menopausal status and menopausal hormone use, family history of CRC, pack-years of smoking, physical activity, regular use of aspirin, regular use of non-steroidal anti-inflammatory drugs, current use of multivitamins, intake of alcohol, red and processed meat, dietary fibre, total folate and total calcium. |
| <b>Hur et al. 2021 [65]</b> | Prospective cohort study (The Nurses' Health Study II) (multicenter), USA | 95464. Only 41272 reported adolescence intake at age 13–18 years | 109 eoCRCs | NA | 41.5 ± 5.5 | F | ● Sugar-sweetened beverages (SSBs) during adulthood (validated food frequency questionnaires -FFQ- every 4 years<br>● SSBs intake during adolescence (FFQ in 1998) | MV RR [≥2 servings of SSBs per day <i>in adulthood</i> ] = <b>2.18</b> (1.10-4.35); Ptrend= <b>0.02</b><br>MV RR [≥2 servings of SSBs per day <i>in adolescence</i> ] = <b>3.41</b> (1.08-10.8); Ptrend= <b>0.01</b>                                                                                                                                     |

|                                       |                                           |    |    |    |      |     |                                                                                        |                                                                                                                                                                                                                                                               |                                                                                                                                            |
|---------------------------------------|-------------------------------------------|----|----|----|------|-----|----------------------------------------------------------------------------------------|---------------------------------------------------------------------------------------------------------------------------------------------------------------------------------------------------------------------------------------------------------------|--------------------------------------------------------------------------------------------------------------------------------------------|
| Li <i>et al.</i> 2021<br>[107]        | Meta-analysis of 4 epidemiologic studies  | NA | NA | NA | ≤ 55 | M/F | ● BMI (kg/m <sup>2</sup> ) (before diagnosis but not near diagnosis)                   | pooled OR [BMI ≥ 25 kg/m <sup>2</sup> and CRC ≤55y] = 1.42 (1.19-1.68); I(2) = 0%, Pheterogeneity = 0.60                                                                                                                                                      | Exclusion criteria: studies only examined risk factors for advanced polyps or combined advanced polyps with CRC in the outcome definition. |
|                                       |                                           |    |    |    |      |     |                                                                                        | pooled OR [BMI ≥ 25 kg/m <sup>2</sup> and CRC <50y] = 1.38 (1.08-1.76)<br>pooled OR [BMI ≥ 30 kg/m <sup>2</sup> and CRC ≤55y] = 1.88 (1.40-2.54); I(2) = 92%, Pheterogeneity < 0.01<br>pooled OR [BMI ≥ 30 kg/m <sup>2</sup> and CRC <50y] = 1.87 (1.31-2.68) |                                                                                                                                            |
| O'Sullivan <i>et al.</i> 2021<br>[83] | Meta-analysis of 14 epidemiologic studies | NA | NA | NA | < 50 | M/F | ● BMI (kg/m <sup>2</sup> )<br>● Alcohol (high vs. non-drinkers)<br>● Cigarette Smoking | Pooled RR [obesity] = 1.54 (1.01-2.35), I2 = 98.7% p=0.00<br>Pooled RR [alcohol] = 1.71 (1.62-                                                                                                                                                                | Exclusion criteria: studies only examined risk factors for advanced polyps or combined                                                     |

|  |  |  |  |  |  |  |  |  |  |  |  |  |  |  |  |  |  |  |  |  |  |  |  |  |  |  |  |  |  |  |  |  |  |  |  |  |  |  |  |  |  |  |  |  |  |  |  |  |  |  |  |  |  |  |  |  |  |  |  |  |  |  |  |  |  |  |  |  |  |  |  |  |  |  |  |  |  |  |  |  |  |  |  |  |  |  |  |  |  |  |  |  |  |  |  |  |  |  |  |  |  |  |  |  |  |  |  |  |  |  |  |  |  |  |  |  |  |  |  |  |  |  |  |  |  |  |  |  |  |  |  |  |  |  |  |  |  |  |  |  |  |  |  |  |  |  |  |  |  |  |  |  |  |  |  |  |  |  |  |  |  |  |  |  |  |  |  |  |  |  |  |  |  |  |  |  |  |  |  |  |  |  |  |  |  |  |  |  |  |  |  |  |  |  |  |  |  |  |  |  |  |  |  |  |  |  |  |  |  |  |  |  |  |  |  |  |  |  |  |  |  |  |  |  |  |  |  |  |  |  |  |  |  |  |  |  |  |  |  |  |  |  |  |  |  |  |  |  |  |  |  |  |  |  |  |  |  |  |  |  |  |  |  |  |  |  |  |  |  |  |  |  |  |  |  |  |  |  |  |  |  |  |  |  |  |  |  |  |  |  |  |  |  |  |  |  |  |  |  |  |  |  |  |  |  |  |  |  |  |  |  |  |  |  |  |  |  |  |  |  |  |  |  |  |  |  |  |  |  |  |  |  |  |  |  |  |  |  |  |  |  |  |  |  |  |  |  |  |  |  |  |  |  |  |  |  |  |  |  |  |  |  |  |  |  |  |  |  |  |  |  |  |  |  |  |  |  |  |  |  |  |  |  |  |  |  |  |  |  |  |  |  |  |  |  |  |  |  |  |  |  |  |  |  |  |  |  |  |  |  |  |  |  |  |  |  |  |  |  |  |  |  |  |  |  |  |  |  |  |  |  |  |  |  |  |  |  |  |  |  |  |  |  |  |  |  |  |  |  |  |  |  |  |  |  |  |  |  |  |  |  |  |  |  |  |  |  |  |  |  |  |  |  |  |  |  |  |  |  |  |  |  |  |  |  |  |  |  |  |  |  |  |  |  |  |  |  |  |  |  |  |  |  |  |  |  |  |  |  |  |  |  |  |  |  |  |  |  |  |  |  |  |  |  |  |  |  |  |  |  |  |  |  |  |  |  |  |  |  |  |  |  |  |  |  |  |  |  |  |  |  |  |  |  |  |  |  |  |  |  |  |  |  |  |  |  |  |  |  |  |  |  |  |  |  |  |  |  |  |  |  |  |  |  |  |  |  |  |  |  |  |  |  |  |  |  |  |  |  |  |  |  |  |  |  |  |  |  |  |  |  |  |  |  |  |  |  |  |  |  |  |  |  |  |  |  |  |  |  |  |  |  |  |  |  |  |  |  |  |  |  |  |  |  |  |  |  |  |  |  |  |  |  |  |  |  |  |  |  |  |  |  |  |  |  |  |  |  |  |  |  |  |  |  |  |  |  |  |  |  |  |  |  |  |  |  |  |  |  |  |  |  |  |  |  |  |  |  |  |  |  |  |  |  |  |  |  |  |  |  |  |  |  |  |  |  |  |  |  |  |  |  |  |  |  |  |  |  |  |  |  |  |  |  |  |  |  |  |  |  |  |  |  |  |  |  |  |  |  |  |  |  |  |  |  |  |  |  |  |  |  |  |  |  |  |  |  |  |  |  |  |  |  |  |  |  |  |  |  |  |  |  |  |  |  |  |  |  |  |  |  |  |  |  |  |  |  |  |  |  |  |  |  |  |  |  |  |  |  |  |  |  |  |  |  |  |  |  |  |  |  |  |  |  |  |  |  |  |  |  |  |  |  |  |  |  |  |  |  |  |  |  |  |  |  |  |  |  |  |  |  |  |  |  |  |  |  |  |  |  |  |  |  |  |  |  |  |  |  |  |  |  |  |  |  |  |  |  |  |  |  |  |  |  |  |  |  |  |  |  |  |  |  |  |  |  |  |  |  |  |  |  |  |  |  |  |  |  |  |  |  |  |  |  |  |  |  |  |  |  |  |  |  |  |  |  |  |  |  |  |  |  |  |  |  |  |  |  |  |  |  |  |  |  |  |  |  |  |  |  |  |  |  |  |  |  |  |  |  |  |  |  |  |  |  |  |  |  |  |  |  |  |  |  |  |  |  |  |  |  |  |  |  |  |  |  |  |  |  |  |  |  |  |  |  |  |  |  |  |  |  |  |  |  |  |  |  |  |  |  |  |  |  |  |  |  |  |  |  |  |  |  |  |  |  |  |  |  |  |  |  |  |  |  |  |  |  |  |  |  |  |  |  |  |  |  |  |  |  |  |  |  |  |  |  |  |  |  |  |  |  |  |  |  |  |  |  |  |  |  |  |  |  |  |  |  |  |  |  |  |  |  |  |  |  |  |  |  |  |  |  |  |  |  |  |  |  |  |  |  |  |  |  |  |  |  |  |  |  |  |  |  |  |  |  |  |  |  |  |  |  |  |  |  |  |  |  |  |  |  |  |  |  |  |  |  |  |  |  |  |  |  |  |  |  |  |  |  |  |  |  |  |  |  |  |  |  |  |  |  |  |  |  |  |  |  |  |  |  |  |  |  |  |  |  |  |  |  |  |  |  |  |  |  |  |  |  |  |  |  |  |  |  |  |  |  |  |  |  |  |  |  |  |  |  |  |  |  |  |  |  |  |  |  |  |  |  |  |  |  |  |  |  |  |  |  |  |  |  |  |  |  |  |  |  |  |  |  |  |  |  |  |  |  |  |  |  |  |  |  |  |  |  |  |  |  |  |  |  |  |  |  |  |  |  |  |  |  |  |  |  |  |  |  |  |  |  |  |  |  |  |  |  |  |  |  |  |  |  |  |  |  |  |  |  |  |  |  |  |  |  |  |  |  |  |  |  |  |  |  |  |  |  |  |  |  |  |  |  |  |  |  |  |  |  |  |  |  |  |  |  |  |  |  |  |  |  |  |  |  |  |  |  |  |  |  |  |  |  |  |  |  |  |  |  |  |  |  |  |  |  |  |  |  |  |  |  |  |  |  |  |  |  |  |  |  |  |  |  |  |  |  |  |  |  |  |  |  |  |  |  |  |  |  |  |  |  |  |  |  |  |  |  |  |  |  |  |  |  |  |  |  |  |  |  |  |  |  |  |  |  |  |  |  |  |  |  |  |  |  |  |  |  |  |  |  |  |  |  |  |  |  |  |  |  |  |  |  |  |  |  |  |  |  |  |  |  |  |
|--|--|--|--|--|--|--|--|--|--|--|--|--|--|--|--|--|--|--|--|--|--|--|--|--|--|--|--|--|--|--|--|--|--|--|--|--|--|--|--|--|--|--|--|--|--|--|--|--|--|--|--|--|--|--|--|--|--|--|--|--|--|--|--|--|--|--|--|--|--|--|--|--|--|--|--|--|--|--|--|--|--|--|--|--|--|--|--|--|--|--|--|--|--|--|--|--|--|--|--|--|--|--|--|--|--|--|--|--|--|--|--|--|--|--|--|--|--|--|--|--|--|--|--|--|--|--|--|--|--|--|--|--|--|--|--|--|--|--|--|--|--|--|--|--|--|--|--|--|--|--|--|--|--|--|--|--|--|--|--|--|--|--|--|--|--|--|--|--|--|--|--|--|--|--|--|--|--|--|--|--|--|--|--|--|--|--|--|--|--|--|--|--|--|--|--|--|--|--|--|--|--|--|--|--|--|--|--|--|--|--|--|--|--|--|--|--|--|--|--|--|--|--|--|--|--|--|--|--|--|--|--|--|--|--|--|--|--|--|--|--|--|--|--|--|--|--|--|--|--|--|--|--|--|--|--|--|--|--|--|--|--|--|--|--|--|--|--|--|--|--|--|--|--|--|--|--|--|--|--|--|--|--|--|--|--|--|--|--|--|--|--|--|--|--|--|--|--|--|--|--|--|--|--|--|--|--|--|--|--|--|--|--|--|--|--|--|--|--|--|--|--|--|--|--|--|--|--|--|--|--|--|--|--|--|--|--|--|--|--|--|--|--|--|--|--|--|--|--|--|--|--|--|--|--|--|--|--|--|--|--|--|--|--|--|--|--|--|--|--|--|--|--|--|--|--|--|--|--|--|--|--|--|--|--|--|--|--|--|--|--|--|--|--|--|--|--|--|--|--|--|--|--|--|--|--|--|--|--|--|--|--|--|--|--|--|--|--|--|--|--|--|--|--|--|--|--|--|--|--|--|--|--|--|--|--|--|--|--|--|--|--|--|--|--|--|--|--|--|--|--|--|--|--|--|--|--|--|--|--|--|--|--|--|--|--|--|--|--|--|--|--|--|--|--|--|--|--|--|--|--|--|--|--|--|--|--|--|--|--|--|--|--|--|--|--|--|--|--|--|--|--|--|--|--|--|--|--|--|--|--|--|--|--|--|--|--|--|--|--|--|--|--|--|--|--|--|--|--|--|--|--|--|--|--|--|--|--|--|--|--|--|--|--|--|--|--|--|--|--|--|--|--|--|--|--|--|--|--|--|--|--|--|--|--|--|--|--|--|--|--|--|--|--|--|--|--|--|--|--|--|--|--|--|--|--|--|--|--|--|--|--|--|--|--|--|--|--|--|--|--|--|--|--|--|--|--|--|--|--|--|--|--|--|--|--|--|--|--|--|--|--|--|--|--|--|--|--|--|--|--|--|--|--|--|--|--|--|--|--|--|--|--|--|--|--|--|--|--|--|--|--|--|--|--|--|--|--|--|--|--|--|--|--|--|--|--|--|--|--|--|--|--|--|--|--|--|--|--|--|--|--|--|--|--|--|--|--|--|--|--|--|--|--|--|--|--|--|--|--|--|--|--|--|--|--|--|--|--|--|--|--|--|--|--|--|--|--|--|--|--|--|--|--|--|--|--|--|--|--|--|--|--|--|--|--|--|--|--|--|--|--|--|--|--|--|--|--|--|--|--|--|--|--|--|--|--|--|--|--|--|--|--|--|--|--|--|--|--|--|--|--|--|--|--|--|--|--|--|--|--|--|--|--|--|--|--|--|--|--|--|--|--|--|--|--|--|--|--|--|--|--|--|--|--|--|--|--|--|--|--|--|--|--|--|--|--|--|--|--|--|--|--|--|--|--|--|--|--|--|--|--|--|--|--|--|--|--|--|--|--|--|--|--|--|--|--|--|--|--|--|--|--|--|--|--|--|--|--|--|--|--|--|--|--|--|--|--|--|--|--|--|--|--|--|--|--|--|--|--|--|--|--|--|--|--|--|--|--|--|--|--|--|--|--|--|--|--|--|--|--|--|--|--|--|--|--|--|--|--|--|--|--|--|--|--|--|--|--|--|--|--|--|--|--|--|--|--|--|--|--|--|--|--|--|--|--|--|--|--|--|--|--|--|--|--|--|--|--|--|--|--|--|--|--|--|--|--|--|--|--|--|--|--|--|--|--|--|--|--|--|--|--|--|--|--|--|--|--|--|--|--|--|--|--|--|--|--|--|--|--|--|--|--|--|--|--|--|--|--|--|--|--|--|--|--|--|--|--|--|--|--|--|--|--|--|--|--|--|--|--|--|--|--|--|--|--|--|--|--|--|--|--|--|--|--|--|--|--|--|--|--|--|--|--|--|--|--|--|--|--|--|--|--|--|--|--|--|--|--|--|--|--|--|--|--|--|--|--|--|--|--|--|--|--|--|--|--|--|--|--|--|--|--|--|--|--|--|--|--|--|--|--|--|--|--|--|--|--|--|--|--|--|--|--|--|--|--|--|--|--|--|--|--|--|--|--|--|--|--|--|--|--|--|--|--|--|--|--|--|--|--|--|--|--|--|--|--|--|--|--|--|--|--|--|--|--|--|--|--|--|--|--|--|--|--|--|--|--|--|--|--|--|--|--|--|--|--|--|--|--|--|--|--|--|--|--|--|--|--|--|--|--|--|--|--|--|--|--|--|--|--|--|--|--|--|--|--|--|--|--|--|--|--|--|--|--|--|--|--|--|--|--|--|--|--|--|--|--|--|--|--|--|--|--|--|--|--|--|--|--|--|--|--|--|--|--|--|--|--|--|--|--|--|--|--|--|--|--|--|--|--|--|--|--|--|--|--|--|--|--|--|--|--|--|--|--|--|--|--|--|--|--|--|--|--|--|--|--|--|--|--|--|--|--|--|--|--|--|--|--|--|--|--|--|--|--|--|--|--|--|--|--|--|--|--|--|--|--|--|--|--|--|--|--|--|--|--|--|--|--|--|--|--|--|--|--|--|--|--|--|--|--|--|--|--|--|--|--|--|--|--|--|--|--|--|--|--|--|--|--|--|--|--|--|--|--|--|--|--|--|--|--|--|--|--|--|--|--|--|--|--|--|--|--|--|--|--|--|--|--|--|--|--|--|--|--|--|--|--|--|--|--|--|--|--|--|--|--|--|--|--|--|--|--|--|--|--|--|--|--|--|--|--|--|--|--|--|--|--|--|--|--|--|--|--|--|--|--|--|--|--|--|--|--|--|--|--|--|--|--|--|--|--|--|--|--|--|--|--|--|--|--|--|--|--|--|--|--|
|  |  |  |  |  |  |  |  |  |  |  |  |  |  |  |  |  |  |  |  |  |  |  |  |  |  |  |  |  |  |  |  |  |  |  |  |  |  |  |  |  |  |  |  |  |  |  |  |  |  |  |  |  |  |  |  |  |  |  |  |  |  |  |  |  |  |  |  |  |  |  |  |  |  |  |  |  |  |  |  |  |  |  |  |  |  |  |  |  |  |  |  |  |  |  |  |  |  |  |  |  |  |  |  |  |  |  |  |  |  |  |  |  |  |  |  |  |  |  |  |  |  |  |  |  |  |  |  |  |  |  |  |  |  |  |  |  |  |  |  |  |  |  |  |  |  |  |  |  |  |  |  |  |  |  |  |  |  |  |  |  |  |  |  |  |  |  |  |  |  |  |  |  |  |  |  |  |  |  |  |  |  |  |  |  |  |  |  |  |  |  |  |  |  |  |  |  |  |  |  |  |  |  |  |  |  |  |  |  |  |  |  |  |  |  |  |  |  |  |  |  |  |  |  |  |  |  |  |  |  |  |  |  |  |  |  |  |  |  |  |  |  |  |  |  |  |  |  |  |  |  |  |  |  |  |  |  |  |  |  |  |  |  |  |  |  |  |  |  |  |  |  |  |  |  |  |  |  |  |  |  |  |  |  |  |  |  |  |  |  |  |  |  |  |  |  |  |  |  |  |  |  |  |  |  |  |  |  |  |  |  |  |  |  |  |  |  |  |  |  |  |  |  |  |  |  |  |  |  |  |  |  |  |  |  |  |  |  |  |  |  |  |  |  |  |  |  |  |  |  |  |  |  |  |  |  |  |  |  |  |  |  |  |  |  |  |  |  |  |  |  |  |  |  |  |  |  |  |  |  |  |  |  |  |  |  |  |  |  |  |  |  |  |  |  |  |  |  |  |  |  |  |  |  |  |  |  |  |  |  |  |  |  |  |  |  |  |  |  |  |  |  |  |  |  |  |  |  |  |  |  |  |  |  |  |  |  |  |  |  |  |  |  |  |  |  |  |  |  |  |  |  |  |  |  |  |  |  |  |  |  |  |  |  |  |  |  |  |  |  |  |  |  |  |  |  |  |  |  |  |  |  |  |  |  |  |  |  |  |  |  |  |  |  |  |  |  |  |  |  |  |  |  |  |  |  |  |  |  |  |  |  |  |  |  |  |  |  |  |  |  |  |  |  |  |  |  |  |  |  |  |  |  |  |  |  |  |  |  |  |  |  |  |  |  |  |  |  |  |  |  |  |  |  |  |  |  |  |  |  |  |  |  |  |  |  |  |  |  |  |  |  |  |  |  |  |  |  |  |  |  |  |  |  |  |  |  |  |  |  |  |  |  |  |  |  |  |  |  |  |  |  |  |  |  |  |  |  |  |  |  |  |  |  |  |  |  |  |  |  |  |  |  |  |  |  |  |  |  |  |  |  |  |  |  |  |  |  |  |  |  |  |  |  |  |  |  |  |  |  |  |  |  |  |  |  |  |  |  |  |  |  |  |  |  |  |  |  |  |  |  |  |  |  |  |  |  |  |  |  |  |  |  |  |  |  |  |  |  |  |  |  |  |  |  |  |  |  |  |  |  |  |  |  |  |  |  |  |  |  |  |  |  |  |  |  |  |  |  |  |  |  |  |  |  |  |  |  |  |  |  |  |  |  |  |  |  |  |  |  |  |  |  |  |  |  |  |  |  |  |  |  |  |  |  |  |  |  |  |  |  |  |  |  |  |  |  |  |  |  |  |  |  |  |  |  |  |  |  |  |  |  |  |  |  |  |  |  |  |  |  |  |  |  |  |  |  |  |  |  |  |  |  |  |  |  |  |  |  |  |  |  |  |  |  |  |  |  |  |  |  |  |  |  |  |  |  |  |  |  |  |  |  |  |  |  |  |  |  |  |  |  |  |  |  |  |  |  |  |  |  |  |  |  |  |  |  |  |  |  |  |  |  |  |  |  |  |  |  |  |  |  |  |  |  |  |  |  |  |  |  |  |  |  |  |  |  |  |  |  |  |  |  |  |  |  |  |  |  |  |  |  |  |  |  |  |  |  |  |  |  |  |  |  |  |  |  |  |  |  |  |  |  |  |  |  |  |  |  |  |  |  |  |  |  |  |  |  |  |  |  |  |  |  |  |  |  |  |  |  |  |  |  |  |  |  |  |  |  |  |  |  |  |  |  |  |  |  |  |  |  |  |  |  |  |  |  |  |  |  |  |  |  |  |  |  |  |  |  |  |  |  |  |  |  |  |  |  |  |  |  |  |  |  |  |  |  |  |  |  |  |  |  |  |  |  |  |  |  |  |  |  |  |  |  |  |  |  |  |  |  |  |  |  |  |  |  |  |  |  |  |  |  |  |  |  |  |  |  |  |  |  |  |  |  |  |  |  |  |  |  |  |  |  |  |  |  |  |  |  |  |  |  |  |  |  |  |  |  |  |  |  |  |  |  |  |  |  |  |  |  |  |  |  |  |  |  |  |  |  |  |  |  |  |  |  |  |  |  |  |  |  |  |  |  |  |  |  |  |  |  |  |  |  |  |  |  |  |  |  |  |  |  |  |  |  |  |  |  |  |  |  |  |  |  |  |  |  |  |  |  |  |  |  |  |  |  |  |  |  |  |  |  |  |  |  |  |  |  |  |  |  |  |  |  |  |  |  |  |  |  |  |  |  |  |  |  |  |  |  |  |  |  |  |  |  |  |  |  |  |  |  |  |  |  |  |  |  |  |  |  |  |  |  |  |  |  |  |  |  |  |  |  |  |  |  |  |  |  |  |  |  |  |  |  |  |  |  |  |  |  |  |  |  |  |  |  |  |  |  |  |  |  |  |  |  |  |  |  |  |  |  |  |  |  |  |  |  |  |  |  |  |  |  |  |  |  |  |  |  |  |  |  |  |  |  |  |  |  |  |  |  |  |  |  |  |  |  |  |  |  |  |  |  |  |  |  |  |  |  |  |  |  |  |  |  |  |  |  |  |  |  |  |  |  |  |  |  |  |  |  |  |  |  |  |  |  |  |  |  |  |  |  |  |  |  |  |  |  |  |  |  |  |  |  |  |  |  |  |  |  |  |  |  |  |  |  |  |  |  |  |  |  |  |  |  |  |  |  |  |  |  |  |  |  |  |  |  |  |  |  |  |  |  |  |  |  |  |  |  |  |  |  |  |  |  |  |  |  |  |  |  |  |  |  |  |  |  |  |  |  |  |  |  |  |  |  |  |  |  |  |  |  |  |  |  |  |  |  |  |  |  |  |  |  |  |  |  |  |  |  |  |  |  |  |  |  |  |  |
|--|--|--|--|--|--|--|--|--|--|--|--|--|--|--|--|--|--|--|--|--|--|--|--|--|--|--|--|--|--|--|--|--|--|--|--|--|--|--|--|--|--|--|--|--|--|--|--|--|--|--|--|--|--|--|--|--|--|--|--|--|--|--|--|--|--|--|--|--|--|--|--|--|--|--|--|--|--|--|--|--|--|--|--|--|--|--|--|--|--|--|--|--|--|--|--|--|--|--|--|--|--|--|--|--|--|--|--|--|--|--|--|--|--|--|--|--|--|--|--|--|--|--|--|--|--|--|--|--|--|--|--|--|--|--|--|--|--|--|--|--|--|--|--|--|--|--|--|--|--|--|--|--|--|--|--|--|--|--|--|--|--|--|--|--|--|--|--|--|--|--|--|--|--|--|--|--|--|--|--|--|--|--|--|--|--|--|--|--|--|--|--|--|--|--|--|--|--|--|--|--|--|--|--|--|--|--|--|--|--|--|--|--|--|--|--|--|--|--|--|--|--|--|--|--|--|--|--|--|--|--|--|--|--|--|--|--|--|--|--|--|--|--|--|--|--|--|--|--|--|--|--|--|--|--|--|--|--|--|--|--|--|--|--|--|--|--|--|--|--|--|--|--|--|--|--|--|--|--|--|--|--|--|--|--|--|--|--|--|--|--|--|--|--|--|--|--|--|--|--|--|--|--|--|--|--|--|--|--|--|--|--|--|--|--|--|--|--|--|--|--|--|--|--|--|--|--|--|--|--|--|--|--|--|--|--|--|--|--|--|--|--|--|--|--|--|--|--|--|--|--|--|--|--|--|--|--|--|--|--|--|--|--|--|--|--|--|--|--|--|--|--|--|--|--|--|--|--|--|--|--|--|--|--|--|--|--|--|--|--|--|--|--|--|--|--|--|--|--|--|--|--|--|--|--|--|--|--|--|--|--|--|--|--|--|--|--|--|--|--|--|--|--|--|--|--|--|--|--|--|--|--|--|--|--|--|--|--|--|--|--|--|--|--|--|--|--|--|--|--|--|--|--|--|--|--|--|--|--|--|--|--|--|--|--|--|--|--|--|--|--|--|--|--|--|--|--|--|--|--|--|--|--|--|--|--|--|--|--|--|--|--|--|--|--|--|--|--|--|--|--|--|--|--|--|--|--|--|--|--|--|--|--|--|--|--|--|--|--|--|--|--|--|--|--|--|--|--|--|--|--|--|--|--|--|--|--|--|--|--|--|--|--|--|--|--|--|--|--|--|--|--|--|--|--|--|--|--|--|--|--|--|--|--|--|--|--|--|--|--|--|--|--|--|--|--|--|--|--|--|--|--|--|--|--|--|--|--|--|--|--|--|--|--|--|--|--|--|--|--|--|--|--|--|--|--|--|--|--|--|--|--|--|--|--|--|--|--|--|--|--|--|--|--|--|--|--|--|--|--|--|--|--|--|--|--|--|--|--|--|--|--|--|--|--|--|--|--|--|--|--|--|--|--|--|--|--|--|--|--|--|--|--|--|--|--|--|--|--|--|--|--|--|--|--|--|--|--|--|--|--|--|--|--|--|--|--|--|--|--|--|--|--|--|--|--|--|--|--|--|--|--|--|--|--|--|--|--|--|--|--|--|--|--|--|--|--|--|--|--|--|--|--|--|--|--|--|--|--|--|--|--|--|--|--|--|--|--|--|--|--|--|--|--|--|--|--|--|--|--|--|--|--|--|--|--|--|--|--|--|--|--|--|--|--|--|--|--|--|--|--|--|--|--|--|--|--|--|--|--|--|--|--|--|--|--|--|--|--|--|--|--|--|--|--|--|--|--|--|--|--|--|--|--|--|--|--|--|--|--|--|--|--|--|--|--|--|--|--|--|--|--|--|--|--|--|--|--|--|--|--|--|--|--|--|--|--|--|--|--|--|--|--|--|--|--|--|--|--|--|--|--|--|--|--|--|--|--|--|--|--|--|--|--|--|--|--|--|--|--|--|--|--|--|--|--|--|--|--|--|--|--|--|--|--|--|--|--|--|--|--|--|--|--|--|--|--|--|--|--|--|--|--|--|--|--|--|--|--|--|--|--|--|--|--|--|--|--|--|--|--|--|--|--|--|--|--|--|--|--|--|--|--|--|--|--|--|--|--|--|--|--|--|--|--|--|--|--|--|--|--|--|--|--|--|--|--|--|--|--|--|--|--|--|--|--|--|--|--|--|--|--|--|--|--|--|--|--|--|--|--|--|--|--|--|--|--|--|--|--|--|--|--|--|--|--|--|--|--|--|--|--|--|--|--|--|--|--|--|--|--|--|--|--|--|--|--|--|--|--|--|--|--|--|--|--|--|--|--|--|--|--|--|--|--|--|--|--|--|--|--|--|--|--|--|--|--|--|--|--|--|--|--|--|--|--|--|--|--|--|--|--|--|--|--|--|--|--|--|--|--|--|--|--|--|--|--|--|--|--|--|--|--|--|--|--|--|--|--|--|--|--|--|--|--|--|--|--|--|--|--|--|--|--|--|--|--|--|--|--|--|--|--|--|--|--|--|--|--|--|--|--|--|--|--|--|--|--|--|--|--|--|--|--|--|--|--|--|--|--|--|--|--|--|--|--|--|--|--|--|--|--|--|--|--|--|--|--|--|--|--|--|--|--|--|--|--|--|--|--|--|--|--|--|--|--|--|--|--|--|--|--|--|--|--|--|--|--|--|--|--|--|--|--|--|--|--|--|--|--|--|--|--|--|--|--|--|--|--|--|--|--|--|--|--|--|--|--|--|--|--|--|--|--|--|--|--|--|--|--|--|--|--|--|--|--|--|--|--|--|--|--|--|--|--|--|--|--|--|--|--|--|--|--|--|--|--|--|--|--|--|--|--|--|--|--|--|--|--|--|--|--|--|--|--|--|--|--|--|--|--|--|--|--|--|--|--|--|--|--|--|--|--|--|--|--|--|--|--|--|--|--|--|--|--|--|--|--|--|--|--|--|--|--|--|--|--|--|--|--|--|--|--|--|--|--|--|--|--|--|--|--|--|--|--|--|--|--|--|--|--|--|--|--|--|--|--|--|--|--|--|--|--|--|--|--|--|--|--|--|--|--|--|--|--|--|--|--|--|--|--|--|--|--|--|--|--|--|--|--|--|--|--|--|--|--|--|--|--|--|--|--|--|--|--|--|--|--|--|--|--|--|--|--|--|--|--|--|--|--|--|--|--|--|--|--|--|--|--|--|--|--|--|--|--|--|--|--|--|--|--|--|--|--|--|--|--|--|--|--|--|--|--|--|--|--|--|--|--|--|--|--|--|--|--|--|--|--|--|
